# Supplementary material for: Exploring Symptom Clusters and Measurements in Patients with Heart Failure - A Scope Review
Source: Research Square preprint supplement (doi:10.21203/rs.3.rs-6684234/v1), 2025-06-23
Supplement: Supplementary file 1 [file 3470ce5be147a5fd2811a743.docx]

| Yu et al., 2016（Hong Kong, China） | Herr et al., 2015(U.K) | Song et al., 2010( South Korea) | Study(country) |
| --- | --- | --- | --- |
| Identify symptom clusters among patients with advanced HF and the independent relationships with their quality of life. | Identify symptom clusters in individuals with heart failure and evaluate the relationship of the identified clusters to functional status. | Explore which physical symptom clusters occur in HF patients and to determine the impact of symptom clusters on event-free survival. | Aim |
| - Advanced HF patients from geriatric unit of hospital - n=119; mean age =82.9 years; male 59% - NYHA III 62.2%; NYHA IV 37.8% | w   Patients with heart failure recruited from an academic medical centre  w   n=117, mean age=56, male 62%  w   NYHA II 44%; NYHA III 39%; NYHA IV 13% | - Hospitalized patients for exacerbation of chronic HF - n=421; mean age =62; male 60.3%   NYHA I 17.3%; NYHA II 38.2%; NYHA III 34.2%; NYHA IV 10.2% | Patient Characteristics |
| Cross-sectional study | Cross-sectional study | Prospective study | Type of research |
| Hierarchical regression analysis | Principal components factor analysis | Agglomerative Hierarchical Clustering approach | Statistical analysis |
| Symptoms: Edmonton Symptom Assessment Scale (ESAS)  Quality of life: McGill Quality of Life Questionnaire (MqoL Chinese version) | Symptoms: Cardiovascular Limitation and Symptoms Profile Shortness of Breath subscale (CLASP-SOB); Brief Fatigue Inventory; Visual Analogue scale for peripheral oedema; Hospital Anxiety & Depression Scale (HADS); 36- Item Short Form Health Survey Bodily Pain Scale (SF36-Bodily Pain); Food Eating Experience and Diet Instrument (FEED); General Sleep Disturbance Scale; Medical outcome study (MOS) Cognitive Function Scale | Physical symptoms: Memorial Symptom Assessment Scale-Heart Failure (MSAS-HF) | Symptom assessment tool |
| Cluster 1: distressing (shortness of breath, depression and anxiety)  Cluster 2: deconditioning (fatigue, nausea, drowsiness and reduced appetite)  Cluster 3: discomforting (pain and overall discomfort) | Cluster 1: sickness behaviour (anxiety, depression, daytime function, cognitive function and fatigue)  Cluster 2: discomforts of illness (shortness of breath, oedema and  pain)  Cluster 3: gastrointestinal distress (appetite and hunger) | Cluster 1: dyspnoeic (waking up breathless at night, difficulty breathing when lying flat and shortness of breath)  Cluster 2: weary (lack of energy, lack of appetite and difficulty sleeping.  Other symptoms including oedema, dizziness, chest discomfort and palpitation did not belong to any clusters. | Symptom cluster |
| - | - | - | Influencing factor |

| Yi et al., 2018(China) | Huang et al., 2018(Taiwan, China) | Park et al., 2017(U.S) | Study(country) |
| --- | --- | --- | --- |
| Investigate symptoms in patients with heart failure and to explore symptom clusters and their relationship to quality of life. | Define symptom clusters and their association with event-free survival in terms of cardiac hospitalization and all-cause mortality in patients with HF. | a) Determine if distinct latent classes of HF symptoms could be identified  (b) Explore whether sociodemographic and clinical characteristics influenced symptom cluster membership. | Aim |
| - Hospitalized patients with heart failure - n=186; mean age=68.70; male 66.7% - NYHA II 9.5%; NYHA III 73.8%; NYHA IV 27.4% | - Outpatient HF clinics - n=258; mean age=61.2; male 75%   NYHA I/II 59.3%; NYHA III/IV 40.7% | - Outpatient HF clinics - n=4011; mean age=64.47; male 57.2%   NYHA I 8.1%; NYHA II 34.1%; NYHA III 42.5%; NYHA IV 15.3% | Patient Characteristics |
| Cross-sectional study | Prospective study | Cross-sectional study | Type of research |
| Principal component analysis | Agglomerative hierarchical cluster analysis and non-hierarchical k-means cluster analysis. | Latent class analysis | Statistical analysis |
| Physical symptoms: Memorial Symptom Assessment Scale-Heart Failure (MSAS-HF)  Quality of life: the Minnesota Living with Heart Failure Questionnaire (MLHFQ) | Physical symptoms: Modified Pulmonary Function Status and Dyspnea Questionnaire (PFSDQ-M), the Minnesota Living with Heart Failure Questionnaire (MLHFQ).  Pychosocial status: the Brief Symptom Inventory (BSI), Control Attitudes Scale-Revised (CAS-R), Multidimensional Scale of Perceived Social Support (MSPSS). | Physical symptoms:the Minnesota Living with Heart Failure Questionnaire (MLHFQ) | Symptom assessment tool |
| Cluster 1: Respiratory symptoms(difficulty breathing when lying down, waking up at night with suffocation, difficulty sleeping)  Cluster 2: Fatigue(fatigue, dry mouth, sweating, easily sleepy)  Cluster 3: Gastrointestinal symptoms(bloating, lack of appetite, nausea)  Cluster 4: Ischemic symptom(dizziness, chest pain, palpitations)  Cluster 5: Bruising Symptom(Edema, cough, shortness of breath) | Cluster 1: non-symptom group(low levels for each symptom, including dyspnea, fatigue, leg edema, sleeplessness, eatless, poor memory)  Cluster 2: typical symptom group(oderate levels of all six symptoms).  Cluster 3: atypical symptom group(low levels of dyspnea and fatigue and moderate levels of the remaining four symptoms) | Cluster 1: Low distress(mild levels of physical and psychological symptoms )  Cluster 2: Physical distress(a severe level of physical symptoms but a moderate level of psychological symptoms)  Clusrer 3: Psychological distres(a moderate level of physical symptoms but a severe level of psychological symptoms)  Cluster 4: High distress(severe levels of both physical and psychological symptoms )Cluster 1: Low distress(mild levels of physical and psychological symptoms )  Cluster 2: Physical distress(a severe level of physical symptoms but a moderate level of psychological symptoms)  Clusrer 3: Psychological distres(a moderate level of physical symptoms but a severe level of psychological symptoms)  Cluster 4: High distress(severe levels of both physical and psychological symptoms ) | Symptom cluster |
| - | NYHA class, living arrangement, anxiety, perceived control | Age, education level, and comorbidities(hypertension, atrial fibrillation, and diabetes | Influencing factor |

| Wang et al., 2021(China) | Hu et al., 2020(China) | Salyer et al., 2019(U.S) | Study(country) |
| --- | --- | --- | --- |
| Assessing symptom clusters, psychological resilience, and quality of life in CHF patients | Identify symptom clusters among patients with chronic heart failure (HF) and examine their independent relationships with quality of life (QoL). | a) examine prevalent symptoms experienced by persons with HF  b) identify symptoms forming clusters  c) evaluate the impact of HF symptom clusters on quality of life (QOL). | Aim |
| - Chronic heart failure patients hospitalized in the cardiology department - n=214, mean age=62.13, male 62.21% - NYHA II 26.67%; NYHA III 35.05%; NYHA IV 38.32% | - Chronic heart failure patients hospitalized in the cardiology department - n=201, mean age=65.89, male 52.74%   NYHA II 21.39%; NYHA III 68.13%; NYHA IV 15.43% | - Patients with heart failure - n=117; mean age: 56; male 62%   NYHA II 39.3%; NYHA III 46.2%; NYHA IV 12.8% | Patient Characteristics |
| Cross-sectional study | Cross-sectional study | Cross-sectional study | Type of research |
| Principal components factor analysis | Exploratory factor analysis | Principal component analysis | Statistical analysis |
| Physical symptoms: Memorial Symptom Assessment Scale-Heart Failure (MSAS-HF)  Quality of life: the Minnesota Living with Heart Failure Questionnaire (MLHFQ)  Psychosocial: the Conner-Davidson Resilience Scale (CD-RISC) | Chronic HF symptoms: Memorial Symptom Assessment Scale-Heart Failure (MSASHF) | Anxiety and depression: Hospital Anxiety and Depression Scale(HADS)  Dyspnea: Cardiovascular Limitations and Symptoms Proﬁle (CLASP)  Fatigue: Dyspnea sub-scale Brief fatigue inventory  Peripheral edema: 10 cm Visual Analog Scale (VAS)  Pain: Bodily Pain Scale of the Medical Outcomes Study (MOS) 36  Appetite and hunger: Food, Eating Experiences, and Diet (FEED) questionnaire  Daytime functioning: General sleep disturbance scale  Cognitive impairment: MOS cognitive function scale | Symptom assessment tool |
| Cluster 1: Fatigue symptom (fatigue, difficulty sleeping, sleepiness)  C;uster 2: Dyspnea symptom (shortness of breath, dyspnea lying down, waking up at night)  Cluster 3: Ischemic symptom (palpitations, dizziness, chest pain)  Cluster 4: Bruising symptom (lack of appetite, cough, bloating, edema)  C;uster 5: Negative mood symptom (irritability, tension, worry, sadness) | Cluster 1: Fatigue (a lack of energy, sleep difficulties, a lack of appetite)  Cluster 2: Dyspneic (waking up breathless at night, difficulty breathing when lying flat, shortness of breath)  Cluster 3: Discomfort (sleepiness, dry mouth, sweating)  Cluster 4: congestive (cough, swollen legs or ankles, bloating, nausea, abnormal urination)  Cluster 5: schemic (dizziness, palpitations, chest pain)  Cluster 6: emotional (nervousness, anxiety, sadness) | Cluster 1: Sickness behavior(Cognitive impairment, anxiety, depression, daytime sleepiness and fatigue)  Cluster 2: Discomforts of illness(dyspnea and peripheral edema)  Cluster 3: GI distress | Symptom cluster |
| - | - | Age, NYHA class, co-morbidities, trial ﬁbrillation and other arrhythmias, sleep-disordered breathing, anemia and obesity | Influencing factor |
| Li et al., 2023(China) | Liu et al., 2022(China) | Cai et al., 2021(China) | Study(country) |
| Investigate the composition of symptom clusters in patients with chronic heart failure and to analyze their relationship with quality of life. | Explore the types of symptom clusters and their relationship to quality of life in patients with chronic heart failure. | Investigate the characteristics of symptom clusters in patients with chronic heart failure and to analyze the factors influencing them. | Aim |
| - Patients with chronic heart failure admitted to hospitals - n=1556, male 57.01% - NYHA II 33.93%; NYHA III 33.55%; NYHA IV 32.52% | - Patients with chronic heart failure treated in 5 hospitals - n=1353, mean age=65.4, male 56.98% - NYHA II 35.55%; NYHA III 37.69%; NYHA IV 26.76% | - Patients with chronic heart failure treated in 4 hospitals - n=775, mean age=65.41, male 55.6% - NYHA II 33.2%; NYHA III 37.2%; NYHA IV 29.7% | Patient Characteristics |
| Cross-sectional study | Cross-sectional study | Cross-sectional study | Type of research |
| Systematic clustering method | Systematic clustering method | Systematic clustering method | Statistical analysis |
| Physical symptoms: Memorial Symptom Assessment Scale-Heart Failure (MSAS-HF)  Quality of life: the Minnesota Living with Heart Failure Questionnaire (MLHFQ) | Physical symptoms: Memorial Symptom Assessment Scale-Heart Failure (MSAS-HF)  Quality of life: the Minnesota Living with Heart Failure Questionnaire (MLHFQ) | Physical symptoms: Memorial Symptom Assessment Scale-Heart Failure (MSAS-HF) | Symptom assessment tool |
| Cluster 1: Emotion(Anxiety, difficulty sleeping, sweating, sleepiness, feeling tense, difficulty concentrating, feelings of sadness, irritability and decreased libido/sexuality)  Cluster 2: Bruising(Shortness of breath, chest tightness/pain, difficulty breathing when lying down, edema of legs or arms, numbness of hands and feet and itchy skin)  Cluster 3: Gastrointestinal symptoms(Dry mouth, bloating, nausea, change in dietary taste, constipation, vomiting and diarrhea)  Cluster 4: Ischemic symptoms(Chest pain, palpitations, dizziness, weight changes and coughing) | Cluster 1: Emotional symptoms (worry, grief, feeling tense)  Cluster 2: Bruising symptoms (difficulty breathing when lying down, waking up at night from sleep suffocation, edema of legs or arms)  Cluster 3: Fatigue symptom(sweating, coughing, loss of appetite, weight loss, difficulty concentrating, dry mouth, drowsiness, and difficulty sleeping)  Cluster 4: Ischemic symptoms (chest pain, shortness of breath, lack of energy and palpitations) | Cluster 1: Emotion(Anxiety, feelings of sadness, feeling tense, irritability/irritability)  Cluster 2: organ bruising(Difficulty sleeping, coughing, abnormal urination, edema of the legs or arms, difficulty breathing when lying down, waking up at night from sleep suffocation)  Cluster 3: Gastrointestinal symptoms(Nausea, bloating, constipation, difficulty | Symptom cluster |
| Quality of life score, NT -proBNP, heart rate, 6MWT distance, VO2peak, ejection fraction | - | Sex, education, cardiac function classification and ejection fraction | Influencing factor |
