# Supplementary material for: Exploring Symptom Clusters and Measurements in Patients with Heart Failure - A Scope Review
Source: Research Square preprint supplement (doi:10.21203/rs.3.rs-6684234/v1), 2025-06-23
Supplement: Supplementary file 2 [file ea674a040c1cae3fff229df8.docx]

**Appendix 1: Search strategy**

**Search conducted on January 20, 2025**

| **Search** | **Query** |
| --- | --- |
| #1 | ((("heart failure"[MeSH Terms]) OR ("heart decompensation"[MeSH Terms])) OR ("cardiac failure"[MeSH Terms])) OR ("myocardial failure"[MeSH Terms]) |
| #2 | ((((((("chronic heart failure"[Title/Abstract]) OR ("CHF"[Title/Abstract])) OR ("cardiac failure"[Title/Abstract])) OR ("heart decompensation"[Title/Abstract])) OR ("right-side heart failure"[Title/Abstract])) OR ("myocardial failure"[Title/Abstract])) OR ("congestive heart failure"[Title/Abstract])) OR ("left-side heart failure"[Title/Abstract]) |
| #3 | #1 OR #2 |
| #4 | (((("symptom cluster"[Title/Abstract] OR ("symptom constellation"[Title/Abstract])) OR ("concurrent symptom"[Title/Abstract])) OR ("multiple symptom"[Title/Abstract])) OR ("symptom combination"[Title/Abstract]) |
| #5 | #3 AND #4 Filters: CHINESE or ENGLISH language |
